# Supplementary material
Source: PubMed Central journal article supplement (PMC4156668)

## Surfactant Bilayers Maintain Transmembrane Protein Activity

G. Rayan,<sup>1</sup> V. Adrien,<sup>1,2</sup> M. Reffay,<sup>1</sup> M. Picard,<sup>2</sup> A. Ducruix,<sup>2</sup> M. Schmutz,<sup>3</sup> W. Urbach,<sup>1,4,5,6</sup> and N. Taulier<sup>4,5,6,\*</sup>

<sup>1</sup>Laboratoire de Physique Statistique de l'École Normale Supérieure, UPMC, Université Paris Diderot, CNRS, Paris, France; <sup>2</sup>Laboratoire de Cristallographie et RMN Biologiques, Université Paris Descartes, CNRS, Paris, France; <sup>3</sup>Institut Charles Sadron - UPR 022 – CNRS - Unistra, Strasbourg, France; <sup>4</sup>Sorbonne Université Univ Paris 6, UMR 7371, UMR\_S 1146, Laboratoire d'Imagerie Biomédicale, Paris, France; <sup>5</sup>CNRS, UMR 7371, Laboratoire d'Imagerie Biomédicale, Paris, France; and <sup>6</sup>INSERM, UMR\_S 1146, Laboratoire d'Imagerie Biomédicale, Paris, France

### SUPPORTING MATERIALS

**Fig. S1.** UV-absorption spectra of bacteriorhodopsin in the purple membrane (blue line), in  $\beta$ - OG micelles (green line), in the L<sub>3</sub> phase (black line), and the denatured protein (light-blue line).

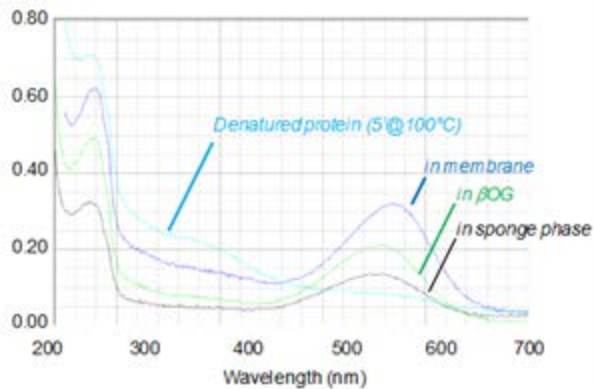

Supplement: mmc1.pdf [file mmc1.pdf]
